# Supplementary material for: Extracellular matrix in multicellular aggregates acts as a pressure sensor controlling cell proliferation and motility
Source: eLife. 2021 Mar 11;10:e63258. doi: 10.7554/eLife.63258 (PMC8064752; doi:10.7554/eLife.63258)
Supplement: Figure 2—source data 1. [file elife-63258-fig2-data1.xlsx]

## Sheet: Fig 2B
	Volume change of MG Beads after exposure to Dextran pressure (eLife Fig 2b)
	Bead	Initial Area [pixels]	Initial Volume [voxels]	Final Area [pixels]	Final Volume [voxels]	MW Dextran [kDa]	Dextran concentration [g/l]	Dextran Pressure [kPa]	Relative volume change [%]	Relative volume change interpolated @ 5 kPa	Average	Colonne1	Sigma	S.E.M.
	1	8127.7	551208	7243.4	463743	1	57	20	-0.158678	-0.0396695
	2	40058.4	6.03121e+06	37081.6	5.37157e+06	1	57	20	-0.10937	-0.0273425
	3	20020.5	2.13096e+06	18381.3	1.87468e+06	1	57	20	-0.120265	-0.0300662
	4	28302.2	3.58174e+06	27846.6	3.4956e+06	1	57	20	-0.0240491	-0.00601227	-0.0257726	±	0.014195	0.0070975
	5	20110.2	2.1453e+06	8865.2	627909	2000	57	5	-0.70731	-0.70731
	6	32491.9	4.40582e+06	13863.3	1.2279e+06	2000	57	5	-0.7213	-0.7213
	7	46297.7	7.49381e+06	16831.8	1.64271e+06	2000	57	5	-0.780792	-0.780792
	8	7984.1	536664	4269.1	209830	2000	57	5	-0.60901	-0.60901
	9	3697.5	169132	2453.2	91403.6	2000	57	5	-0.459573	-0.459573
	10	3441.9	151901	1940.1	64283.6	2000	57	5	-0.576807	-0.576807	-0.642465	±	0.11699	0.0477612

## Sheet: Fig 2C
	Volume change of individual cells after exposure to Dextran pressure (eLife Fig 2c)
	Final Volume [a.u.]	Initial Volume [a.u.]	MW Dextran [kDa]	Dextran concentration [g/l]	Dextran Pressure [kPa]	Relative volume change [%]	Relative volume change interpolated @ 15 kPa
	1303.39	1298	2000	80	10	0.0041596	0.0062394
	785.935	775.503	2000	80	10	0.0134516	0.0201774
	917.275	920.078	2000	80	10	-0.00304662	-0.00456993
	815.807	839.072	2000	80	10	-0.0277273	-0.041591
	900.691	965.872	2000	80	10	-0.0674843	-0.101226
	1047.12	1111.77	2000	80	10	-0.05815	-0.0872251
	755.589	827.234	2000	80	10	-0.086608	-0.129912
	729.898	740.181	2000	80	10	-0.0138931	-0.0208397
	649.415	685.244	2000	80	10	-0.0522863	-0.0784294
	1011.97	1019.99	2000	80	10	-0.00786409	-0.0117961
	687.179	674.365	2000	80	10	0.0190024	0.0285037
	1213.51	1279.86	2000	80	10	-0.0518371	-0.0777557
	968.307	1003.48	2000	80	10	-0.0350535	-0.0525802
	883.435	924.218	2000	80	10	-0.0441267	-0.0661901
	606.023	580.332	2000	80	10	0.044269	0.0664036
	803.677	810.289	2000	80	10	-0.00816106	-0.0122416
	1059.31	1072.68	2000	80	10	-0.0124639	-0.0186959
	689.876	741.902	2000	80	10	-0.0701251	-0.105188
	1376.82	1399.07	2000	80	10	-0.0158997	-0.0238495
	1963.43	1927.65	2000	80	10	0.018561	0.0278415
	1080.49	1081.15	2000	80	10	-0.000608815	-0.000913222
	1125.6	1085.33	2000	80	10	0.0371042	0.0556563
	958.265	974.197	2000	80	10	-0.0163547	-0.024532
	960.309	1039.69	2000	80	10	-0.0763511	-0.114527
	999.245	1047.09	2000	80	10	-0.0456893	-0.068534
	1214.19	1248.98	2000	80	10	-0.0278551	-0.0417826
	1252.43	1332.18	2000	80	10	-0.0598639	-0.0897959
	1014.83	1138.53	2000	80	10	-0.108649	-0.162973
	1177.78	1255.02	2000	80	10	-0.0615479	-0.0923218
	1133.45	1143.83	2000	80	10	-0.00907989	-0.0136198
	1343.02	1412.79	2000	100	15	-0.049385	-0.049385
	882.728	949.902	2000	100	15	-0.070717	-0.070717
	1607.68	1689.28	2000	100	15	-0.0483019	-0.0483019
	1181.63	1161.12	2000	100	15	0.0176597	0.0176597
	1193.74	1301.49	2000	100	15	-0.0827916	-0.0827916
	1469.53	1499.67	2000	100	15	-0.0200977	-0.0200977
	2914.79	2784.05	2000	100	15	0.0469584	0.0469584
	1530.18	1532.96	2000	100	15	-0.00181232	-0.00181232
	1181.59	1292.92	2000	100	15	-0.0861014	-0.0861014
	1780.5	1792.34	2000	100	15	-0.00660744	-0.00660744
	1412.71	1459.8	2000	100	15	-0.0322568	-0.0322568
	1300.18	1307.25	2000	100	15	-0.00541025	-0.00541025
	1259.19	1252.66	2000	100	15	0.00521272	0.00521272
	1481.51	1465.63	2000	100	15	0.0108365	0.0108365
	1286.98	1327.63	2000	100	15	-0.0306127	-0.0306127
	1668.47	1640.26	2000	100	15	0.0172009	0.0172009
	1379.33	1413.05	2000	100	15	-0.0238666	-0.0238666
	1549.88	1797.82	2000	100	15	-0.137913	-0.137913
	1213.8	1254.21	2000	100	15	-0.0322131	-0.0322131
	902.056	965.028	2000	100	15	-0.0652537	-0.0652537
	1229.19	1310.01	2000	100	15	-0.0617004	-0.0617004
	899.966	975.674	2000	100	15	-0.0775959	-0.0775959
	1253.81	1354.96	2000	100	15	-0.0746493	-0.0746493
	1789.28	1736.21	2000	100	15	0.0305637	0.0305637
	1338.72	1317.88	2000	100	15	0.015819	0.015819
	1174.17	1125.28	2000	100	15	0.0434413	0.0434413
	1095.44	1101.33	2000	100	15	-0.00535359	-0.00535359
	1223.21	1264.52	2000	100	15	-0.0326702	-0.0326702
	1513.67	1560.84	2000	100	15	-0.0302249	-0.0302249
	1775.89	1929.4	6	40	25	-0.0795634	-0.0477381
	1119.62	1197.32	6	40	25	-0.0648938	-0.0389363
	1121.17	1165.27	6	40	25	-0.0378435	-0.0227061
	1251.82	1349.34	6	40	25	-0.0722698	-0.0433619
	1232.11	1274.72	6	40	25	-0.0334261	-0.0200557
	1002.11	1076.74	6	40	25	-0.069313	-0.0415878
	1167.76	1228.78	6	40	25	-0.0496609	-0.0297966
	1401.71	1517.6	6	40	25	-0.0763691	-0.0458215
	1514.55	1618.49	6	40	25	-0.0642211	-0.0385326
	908.097	965.768	6	40	25	-0.0597143	-0.0358286
	977.957	1059.19	6	40	25	-0.0766912	-0.0460147
	1720.17	1844.43	6	40	25	-0.0673705	-0.0404223
	1328.31	1439.11	6	40	25	-0.0769907	-0.0461944
	2029.2	2183.72	6	40	25	-0.070758	-0.0424548
	2673.24	2803.7	6	40	25	-0.0465288	-0.0279173
	1420.11	1527.29	6	40	25	-0.0701723	-0.0421034
	1386.85	1512.8	6	40	25	-0.0832519	-0.0499511
	1256.84	1292.23	6	40	25	-0.0273862	-0.0164317
	1530.2	1601.49	6	40	25	-0.0445146	-0.0267088
	1598.08	1727.79	6	40	25	-0.0750722	-0.0450433
	1042.97	1149.3	6	40	25	-0.0925169	-0.0555101
	707.863	768.825	6	40	25	-0.0792926	-0.0475755
	2049.94	2212.3	6	40	25	-0.0733913	-0.0440348
	1027.95	1101.87	6	40	25	-0.0670848	-0.0402509
	2175.46	2281.76	6	40	25	-0.0465858	-0.0279515
	1644.02	1757.3	6	40	25	-0.0644626	-0.0386776
	1085.65	1143.54	6	40	25	-0.0506247	-0.0303748
	2602.61	2670.06	6	40	25	-0.0252646	-0.0151587
	1155.02	1274.72	6	40	25	-0.0938974	-0.0563384
	1342.98	1419.52	6	40	25	-0.0539159	-0.0323496
	1418.77	1505.86	6	40	25	-0.0578394	-0.0347037
	904.693	1006.49	6	40	25	-0.101141	-0.0606848
	1657.68	1553.54	6	40	25	0.0670365	0.0402219
	1188.28	1314.8	6	40	25	-0.0962291	-0.0577374
	913.388	1032.49	6	40	25	-0.115351	-0.0692105

## Sheet: Fig 2D
	Volume change of Multicellular Spheroids after exposure to Dextran pressure (eLife Fig 2d)
	Seeding date	Compression date	Initial numberr of cells	Initial Area [pixels]	Initial Volume [voxels]	Final Area [pixels]	Final Volume [voxels]	MW Dextran [kDa]	Dextran concentration [g/l]	Dextran Pressure [kPa]	Relative volume change [%]
	'22/06/2020'	'24/06/2020'	500	50473.9	8.53029e+06	43802.4	6.89621e+06	0	0	0	-0.191563
	'22/06/2020'	'24/06/2020'	500	45971.8	7.41483e+06	48109.1	7.93789e+06	0	0	0	0.070542
	'22/06/2020'	'24/06/2020'	500	41749.2	6.41706e+06	39738.1	5.95902e+06	0	0	0	-0.0713791
	'22/06/2020'	'24/06/2020'	500	42927.2	6.69056e+06	39738.1	5.95902e+06	0	0	0	-0.10934
	'22/06/2020'	'24/06/2020'	500	41418.2	6.34089e+06	41066.9	6.2604e+06	0	0	0	-0.0126941
	'22/06/2020'	'24/06/2020'	500	43133.6	6.73887e+06	43742	6.88196e+06	0	0	0	0.0212337
	'22/06/2020'	'24/06/2020'	500	42671.2	6.6308e+06	44303.7	7.01493e+06	0	0	0	0.0579302
	'22/06/2020'	'24/06/2020'	500	42671.2	6.6308e+06	38782	5.74525e+06	10	4	1	-0.133552
	'22/06/2020'	'24/06/2020'	500	43469.4	6.81771e+06	41271.3	6.3072e+06	10	4	1	-0.0748807
	'22/06/2020'	'24/06/2020'	500	41757.1	6.41889e+06	43906	6.92068e+06	10	4	1	0.0781746
	'22/06/2020'	'24/06/2020'	500	41698.4	6.40535e+06	43178	6.74929e+06	10	4	1	0.0536962
	'22/06/2020'	'24/06/2020'	500	41265	6.30574e+06	42904.2	6.68518e+06	10	4	1	0.0601735
	'22/06/2020'	'24/06/2020'	500	45981.8	7.41724e+06	46784.3	7.61226e+06	10	4	1	0.0262938
	'22/06/2020'	'24/06/2020'	500	40964.9	6.23709e+06	41872.2	6.44545e+06	2000	26	1	0.0334062
	'22/06/2020'	'24/06/2020'	500	45726.1	7.35547e+06	43728.9	6.87887e+06	2000	26	1	-0.0647956
	'22/06/2020'	'24/06/2020'	500	43835.3	6.90399e+06	46215.1	7.47378e+06	2000	26	1	0.0825304
	'22/06/2020'	'24/06/2020'	500	39904.4	5.99646e+06	40634.7	6.16183e+06	2000	26	1	0.027577
	'22/06/2020'	'24/06/2020'	500	46689.8	7.58922e+06	38159.6	5.60751e+06	2000	26	1	-0.261122
	'22/06/2020'	'24/06/2020'	500	41536.5	6.36807e+06	39723.4	5.95571e+06	2000	26	1	-0.0647544
	'22/06/2020'	'24/06/2020'	500	42652.5	6.62646e+06	42670	6.63053e+06	10	20	5	0.000614235
	'22/06/2020'	'24/06/2020'	500	47563	7.80311e+06	45648.4	7.33671e+06	10	20	5	-0.0597707
	'22/06/2020'	'24/06/2020'	500	45007	7.18263e+06	43317.8	6.78208e+06	10	20	5	-0.0557667
	'22/06/2020'	'24/06/2020'	500	41307.8	6.31557e+06	43352.7	6.79028e+06	10	20	5	0.0751649
	'22/06/2020'	'24/06/2020'	500	40196.5	6.06243e+06	38481.9	5.6787e+06	10	20	5	-0.0632963
	'22/06/2020'	'24/06/2020'	500	45105.4	7.2062e+06	47377.3	7.75744e+06	10	20	5	0.0764952
	'22/06/2020'	'24/06/2020'	500	42411.2	6.5703e+06	42227.1	6.52755e+06	10	20	5	-0.00650636
	'22/06/2020'	'24/06/2020'	500	41981	6.47057e+06	41063.4	6.25958e+06	10	20	5	-0.0326077
	'22/06/2020'	'24/06/2020'	500	41079.2	6.26321e+06	37291.2	5.41718e+06	2000	57	5	-0.135079
	'22/06/2020'	'24/06/2020'	500	43249.5	6.76605e+06	42873.2	6.67795e+06	2000	57	5	-0.0130213
	'22/06/2020'	'24/06/2020'	500	41423.7	6.34217e+06	39499.6	5.90544e+06	2000	57	5	-0.068861
	'22/06/2020'	'24/06/2020'	500	43486.8	6.82182e+06	38191.4	5.61451e+06	2000	57	5	-0.176978
	'22/06/2020'	'24/06/2020'	500	42740.7	6.647e+06	36041.8	5.14722e+06	2000	57	5	-0.225632
	'22/06/2020'	'24/06/2020'	500	45131.6	7.21248e+06	43787.7	6.89274e+06	2000	57	5	-0.0443321
	'12/06/2020'	'15/06/2020'	500	70791.2	1.41688e+07	72728.1	1.47543e+07	0	0	0	0.04132
	'12/06/2020'	'15/06/2020'	500	65639.9	1.26507e+07	63546.2	1.20503e+07	0	0	0	-0.0474605
	'12/06/2020'	'15/06/2020'	500	74689.6	1.53551e+07	74997.6	1.54502e+07	0	0	0	0.00619187
	'12/06/2020'	'15/06/2020'	500	67403.3	1.31639e+07	69097.3	1.36633e+07	0	0	0	0.0379337
	'12/06/2020'	'15/06/2020'	500	66969.9	1.30372e+07	68250.7	1.34129e+07	0	0	0	0.0288242
	'12/06/2020'	'15/06/2020'	500	66969.9	1.30372e+07	70897.6	1.42007e+07	0	0	0	0.0892514
	'12/06/2020'	'15/06/2020'	500	72655.1	1.4732e+07	70897.6	1.42007e+07	0	0	0	-0.0360637
	'12/06/2020'	'15/06/2020'	500	69149.6	1.36788e+07	71917.6	1.45083e+07	0	0	0	0.0606403
	'12/06/2020'	'15/06/2020'	500	68262.2	1.34163e+07	69271.1	1.37149e+07	10	4	1	0.0222519
	'12/06/2020'	'15/06/2020'	500	65221.9	1.25301e+07	66245.9	1.28263e+07	10	4	1	0.0236427
	'12/06/2020'	'15/06/2020'	500	75000	1.5451e+07	73171	1.48892e+07	10	4	1	-0.0363545
	'12/06/2020'	'15/06/2020'	500	67403.3	1.31639e+07	71526.3	1.43901e+07	10	4	1	0.093143
	'12/06/2020'	'15/06/2020'	500	63133.8	1.19332e+07	65508.5	1.26128e+07	2000	26	1	0.0569469
	'12/06/2020'	'15/06/2020'	500	81567.1	1.75241e+07	79954.1	1.70069e+07	2000	26	1	-0.0295157
	'12/06/2020'	'15/06/2020'	500	71788.2	1.44692e+07	72715.8	1.47505e+07	2000	26	1	0.0194436
	'12/06/2020'	'15/06/2020'	500	79653.2	1.6911e+07	74498.7	1.52963e+07	2000	26	1	-0.0954808
	'12/06/2020'	'15/06/2020'	500	77325.8	1.61752e+07	78678.4	1.66015e+07	10	20	5	0.0263535
	'12/06/2020'	'15/06/2020'	500	77244.4	1.61497e+07	75924.7	1.57376e+07	10	20	5	-0.0255172
	'12/06/2020'	'15/06/2020'	500	77325.8	1.61752e+07	78251.8	1.64666e+07	10	20	5	0.018016
	'12/06/2020'	'15/06/2020'	500	65678	1.26617e+07	71319.9	1.43278e+07	10	20	5	0.131584
	'12/06/2020'	'15/06/2020'	500	68274.5	1.342e+07	71823.2	1.44797e+07	10	20	5	0.0789697
	'12/06/2020'	'15/06/2020'	500	72682.5	1.47404e+07	78688.8	1.66048e+07	10	20	5	0.126483
	'12/06/2020'	'15/06/2020'	500	67828	1.32885e+07	72168.5	1.45843e+07	10	20	5	0.097509
	'12/06/2020'	'15/06/2020'	500	71292.1	1.43194e+07	62277.3	1.16912e+07	2000	57	5	-0.183545
	'12/06/2020'	'15/06/2020'	500	71355.6	1.43386e+07	64393.2	1.2292e+07	2000	57	5	-0.14273
	'12/06/2020'	'15/06/2020'	500	70483.2	1.40764e+07	64820.2	1.24145e+07	2000	57	5	-0.118063
	'12/06/2020'	'15/06/2020'	500	65678	1.26617e+07	61432.3	1.1454e+07	2000	57	5	-0.0953808
	'12/06/2020'	'15/06/2020'	500	64393.2	1.2292e+07	62286.8	1.16939e+07	2000	57	5	-0.0486627
	'12/06/2020'	'15/06/2020'	500	69401.3	1.37536e+07	64242.4	1.22489e+07	2000	57	5	-0.109403
	'12/06/2020'	'15/06/2020'	500	71802.1	1.44734e+07	66110.2	1.27869e+07	2000	57	5	-0.11652
	'26/06/2020'	'29/06/2020'	300	54985	9.69908e+06	53130.7	9.2126e+06	0	0	0	-0.0501572
	'26/06/2020'	'29/06/2020'	300	52656	9.08942e+06	53432.4	9.29117e+06	0	0	0	0.0221966
	'26/06/2020'	'29/06/2020'	300	52991.8	9.1765e+06	51382.8	8.76174e+06	0	0	0	-0.0451983
	'26/06/2020'	'29/06/2020'	300	55389.9	9.8064e+06	56310.7	1.00519e+07	0	0	0	0.0250396
	'26/06/2020'	'29/06/2020'	300	59670.1	1.09647e+07	58715.9	1.07028e+07	0	0	0	-0.0238895
	'26/06/2020'	'29/06/2020'	300	55389.9	9.8064e+06	58715.9	1.07028e+07	10	4	1	0.0914103
	'26/06/2020'	'29/06/2020'	300	50753.3	8.60122e+06	49841.2	8.37041e+06	10	4	1	-0.0268348
	'26/06/2020'	'29/06/2020'	300	58973.1	1.07732e+07	57609.4	1.04017e+07	10	4	1	-0.0344862
	'26/06/2020'	'29/06/2020'	300	56443.7	1.00876e+07	55094.6	9.72808e+06	10	4	1	-0.0356366
	'26/06/2020'	'29/06/2020'	300	54593.7	9.59572e+06	61737.1	1.15394e+07	10	4	1	0.202557
	'26/06/2020'	'29/06/2020'	300	53047.4	9.19094e+06	55734.4	9.89803e+06	10	4	1	0.0769339
	'26/06/2020'	'29/06/2020'	300	51480.4	8.78672e+06	50876.3	8.63252e+06	10	4	1	-0.0175496
	'26/06/2020'	'29/06/2020'	300	53047.4	9.19094e+06	53680	9.35585e+06	10	4	1	0.0179427
	'26/06/2020'	'29/06/2020'	300	52276.6	8.99135e+06	54458	9.55996e+06	2000	26	1	0.0632396
	'26/06/2020'	'29/06/2020'	300	55782	9.91072e+06	55775.7	9.90903e+06	2000	26	1	-0.000170749
	'26/06/2020'	'29/06/2020'	300	58173	1.05547e+07	58711.2	1.07015e+07	2000	26	1	0.0139096
	'26/06/2020'	'29/06/2020'	300	46666	7.58341e+06	44271.9	7.00739e+06	2000	26	1	-0.0759589
	'26/06/2020'	'29/06/2020'	300	44551.3	7.07383e+06	42439.8	6.57694e+06	2000	26	1	-0.0702434
	'26/06/2020'	'29/06/2020'	300	51638.8	8.8273e+06	48137.7	7.94497e+06	2000	26	1	-0.0999549
	'26/06/2020'	'29/06/2020'	300	62010.2	1.1616e+07	59809.8	1.10033e+07	2000	26	1	-0.0527522
	'26/06/2020'	'29/06/2020'	300	49582.4	8.3053e+06	45261	7.24352e+06	2000	26	1	-0.127844
	'26/06/2020'	'29/06/2020'	300	53900.7	9.4136e+06	53432.4	9.29117e+06	10	20	5	-0.0130051
	'26/06/2020'	'29/06/2020'	300	45013.3	7.18415e+06	44533.9	7.06967e+06	10	20	5	-0.0159345
	'26/06/2020'	'29/06/2020'	300	56310.7	1.00519e+07	54985	9.69908e+06	10	20	5	-0.0351039
	'26/06/2020'	'29/06/2020'	300	51101.8	8.68996e+06	48350.5	7.99769e+06	10	20	5	-0.0796629
	'26/06/2020'	'29/06/2020'	300	49630.1	8.31727e+06	46439	7.52814e+06	10	20	5	-0.0948787
	'26/06/2020'	'29/06/2020'	300	50131.7	8.4437e+06	45726.1	7.35547e+06	10	20	5	-0.128881
	'26/06/2020'	'29/06/2020'	300	52138.5	8.95574e+06	50100	8.43568e+06	10	20	5	-0.0580692
	'26/06/2020'	'29/06/2020'	300	59524	1.09245e+07	54723.1	9.62986e+06	2000	57	5	-0.118509
	'26/06/2020'	'29/06/2020'	300	54981.9	9.69824e+06	50076.2	8.42967e+06	2000	57	5	-0.130804
	'26/06/2020'	'29/06/2020'	300	59249.3	1.0849e+07	54985	9.69908e+06	2000	57	5	-0.105992
	'26/06/2020'	'29/06/2020'	300	46624.7	7.57335e+06	41520.6	6.36442e+06	2000	57	5	-0.15963
	'26/06/2020'	'29/06/2020'	300	51628.9	8.82475e+06	43787.7	6.89274e+06	2000	57	5	-0.218931
	'26/06/2020'	'29/06/2020'	300	52635.4	9.08407e+06	48868	8.12645e+06	2000	57	5	-0.105418
	'26/06/2020'	'29/06/2020'	300	49136.3	8.19347e+06	47174	7.70759e+06	2000	57	5	-0.0593009
