# Supplementary material for: Extracellular matrix in multicellular aggregates acts as a pressure sensor controlling cell proliferation and motility
Source: eLife. 2021 Mar 11;10:e63258. doi: 10.7554/eLife.63258 (PMC8064752; doi:10.7554/eLife.63258)
Supplement: Figure 3—source data 1. [file elife-63258-fig3-data1.xlsx]

## Sheet: Fig 3C
	Volume change of individual cells after exposure to Dextran pressure (eLife Fig 3c, Exp 2020)										Volume change of individual cells after exposure to Dextran pressure (eLife Fig 3c, Exp 2021)
	Intensity Before	Intensity After	MW Dextran [kDa]	Dextran concentration [g/l]	Dextran Pressure [kPa]	Relative intensity change [%]	Average	Standard Deviation
	58.5391	128.86	6	100	40	2.20127					2MDa
	66.5849	123.212	6	100	40	1.85044					File	Fraction of ICS pixels at 0 kPa	Fraction of ICS pixels at P15kPa	ICS surface change
	68.3667	117.469	6	100	40	1.71822					20210112-Exp2	12.3631	9.45908	-23.4895
	70.0169	112.244	6	100	40	1.60309					20210113-Exp1	14.3851	4.51082	-68.6424
	72.3699	107.725	6	100	40	1.48853					20210114-Exp3	12.5496	6.41726	-48.8648
	75.7267	105.743	6	100	40	1.39638							Mean	-46.9989
	78.6714	104.318	6	100	40	1.326
	81.2857	103.431	6	100	40	1.27244					6kDa
	82.831	104.864	6	100	40	1.266						Fraction of ICS pixels at 0 kPa	Fraction of ICS pixels at P40kPa	ICS surface change
	84.8537	108.489	6	100	40	1.27855					20210112-Exp1	11.2495	13.4585	19.6361
	87.8907	111.324	6	100	40	1.26662					20210113-Exp2	13.3279	20.8924	56.7564
	90.9658	114.28	6	100	40	1.25629							Mean	38.1963
	92.168	115.69	6	100	40	1.25521
	94.6172	114.935	6	100	40	1.21474
	97.3666	117.814	6	100	40	1.21
	102.386	123.803	6	100	40	1.20918
	107.511	130.769	6	100	40	1.21634
	113.671	138.046	6	100	40	1.21443
	121.084	146.632	6	100	40	1.21099
	127.43	157.023	6	100	40	1.23223
	132.588	168.431	6	100	40	1.27034
	139.685	178.684	6	100	40	1.2792
	149.628	187.742	6	100	40	1.25472
	160.027	196.287	6	100	40	1.22659
	169.815	205.387	6	100	40	1.20947
	177.442	215.239	6	100	40	1.21301
	182.994	225.812	6	100	40	1.23399
	190.365	237.806	6	100	40	1.24921
	200.066	248.53	6	100	40	1.24224
	210.256	261.403	6	100	40	1.24326
	220.61	275.587	6	100	40	1.24921
	231.886	290.61	6	100	40	1.25324
	245.961	307.419	6	100	40	1.24987
	261.677	319.938	6	100	40	1.22265
	272.658	327.843	6	100	40	1.2024
	271.84	331.156	6	100	40	1.2182
	278.229	333.251	6	100	40	1.19776
	289.158	340.544	6	100	40	1.17771
	296.613	347.482	6	100	40	1.1715	1.30901	0.20466
	23.109	11.1435	2000	100	15	-0.517784
	24.7808	11.5193	2000	100	15	-0.535151
	25.808	11.8434	2000	100	15	-0.541097
	27.3785	12.3239	2000	100	15	-0.549869
	28.3871	12.9013	2000	100	15	-0.545524
	29.7314	13.5107	2000	100	15	-0.545575
	31.978	14.3032	2000	100	15	-0.552718
	33.9913	14.9579	2000	100	15	-0.559948
	36.2406	15.7288	2000	100	15	-0.56599
	39.9847	16.6027	2000	100	15	-0.584774
	44.7743	17.4864	2000	100	15	-0.609455
	50.8695	18.3418	2000	100	15	-0.639434
	56.8065	19.8181	2000	100	15	-0.65113
	62.7357	20.1294	2000	100	15	-0.679139
	65.892	20.6165	2000	100	15	-0.687116
	66.8463	20.9493	2000	100	15	-0.686606
	68.9948	21.3944	2000	100	15	-0.689912
	70.5188	21.712	2000	100	15	-0.69211
	73.8744	23.4558	2000	100	15	-0.682491
	78.4146	25.699	2000	100	15	-0.672268
	82.95	27.8588	2000	100	15	-0.66415
	88.1382	30.3426	2000	100	15	-0.655738
	91.7558	32.9812	2000	100	15	-0.640555
	96.0093	36.5296	2000	100	15	-0.61952
	100.918	40.4909	2000	100	15	-0.598774
	108.627	44.4867	2000	100	15	-0.590463
	116.858	48.7328	2000	100	15	-0.582973
	123.399	51.6683	2000	100	15	-0.581291
	132.305	54.722	2000	100	15	-0.586396
	142.224	57.2624	2000	100	15	-0.59738
	150.684	60.907	2000	100	15	-0.595796
	159.845	66.1434	2000	100	15	-0.586203
	167.685	70.1482	2000	100	15	-0.581666
	172.352	74.0642	2000	100	15	-0.570273
	179.993	77.2107	2000	100	15	-0.571035
	191.015	80.0915	2000	100	15	-0.580705
	207.691	85.0123	2000	100	15	-0.590679
	216.817	93.4977	2000	100	15	-0.568771
	226.818	99.1973	2000	100	15	-0.562656	-0.6029	0.0505894

## Sheet: Fig 3D
	Volume change of MCS after exposure to Dextran pressure (eLife Fig 3d)
	Equatorial Surface	Major Axis	Minor Axis	Analysis Method	Pressure	Dexrtan MW
	184673	539.394	445.95	'Auto'	0	0
	193020	518.439	486.857	'Auto'	0	0
	155189	475.124	420.289	'Auto'	0	0
	149521	479.313	403.444	'Auto'	0	0
	158946	486.39	421.686	'Auto'	0	0
	135872	437.921	410.262	'Auto'	0	0
	141118	441.497	418.452	'Auto'	0	0
	168075	486.455	445.499	'Auto'	0	0
	145274	444.172	424.186	'Auto'	0	0
	156474	470.173	428.89	'Auto'	0	0
	163684	534.578	397.902	'Auto'	0	0
	152636	450.089	436.875	'Auto'	0	0
	151588	466.701	417.07	'Auto'	0	0
	166476	491.248	437.776	'Auto'	0	0
	167521	500.205	431.85	'Auto'	0	0
	105551	413.617	329.817	'Auto'	0	0
	162846	551.053	425.32	'Auto'	0	0
	163729	480.59	437.801	'Auto'	0	0
	147935	474.883	402.661	'Auto'	0	0
	124899	431.616	381.724	'Auto'	0	0
	284027	843.336	488.339	'Auto'	0	0
	144177	449.085	416.994	'Auto'	0	0
	146623	440.856	427.571	'Auto'	0	0
	153421	454.566	441.917	'Auto'	0	0
	132450	437.18	388.87	'Auto'	0	0
	144499	467.858	398.368	'Auto'	0	0
	138663	443.836	404.526	'Auto'	0	0
	147900	447.752	428.001	'Auto'	0	0
	149101	447.026	430.607	'Auto'	0	0
	157860	465.922	436.719	'Auto'	0	0
	157174	478.66	422.463	'Auto'	0	0
	150909	453.594	432.4	'Auto'	0	0
	154373	474.528	417.17	'Auto'	0	0
	142832	457.432	402.858	'Auto'	0	0
	151774	456.14	430.752	'Auto'	0	0
	221196	1409.44	386.771	'Auto'	0	0
	148134	442.515	432.082	'Auto'	0	0
	131590	445.726	379.726	'Auto'	0	0
	157693	464.549	437.326	'Auto'	0	0
	121879	426.175	405.034	'Auto'	0	0
	155301	459.784	443.079	'Auto'	0	0
	127642	424.867	389.934	'Auto'	0	0
	151439	478.833	408.447	'Auto'	0	0
	153996	469.957	422.361	'Auto'	0	0
	146688	450.576	423.971	'Auto'	0	0
	168090	488.443	445.188	'Auto'	0	0
	177473	499.442	459.241	'Auto'	0	0
	131389	447.348	390.668	'Auto'	0	0
	159671	462.01	448.419	'Auto'	0	0
	144487	445.11	417.117	'Auto'	0	0
	170456	485.604	450.922	'Auto'	0	0
	155034	456.419	439.121	'Auto'	0	0
	141237	448.997	414.571	'Auto'	0	0
	141580	441.33	426.794	'Auto'	0	0
	195968	534.682	476.54	'Auto'	0	0
	144786	449.971	420.416	'Auto'	0	0
	153929	461.464	431.18	'Auto'	0	0
	177038	527.686	432.461	'Auto'	0	0
	118350	397.485	390.253	'Auto'	0	0
	129428	424.784	405.719	'Auto'	0	0
	143636	451.813	421.431	'Auto'	0	0
	218987	625.102	454.715	'Auto'	0	0
	166099	471.372	456.8	'Auto'	0	0
	140114	453.927	399.385	'Auto'	0	0
	159000	501	405	'Manual'	15	2000
	173000	474	465	'Manual'	15	2000
	148000	435	435	'Manual'	15	2000
	120998	446.397	365.608	'Auto'	15	2000
	146000	434	429	'Manual'	15	2000
	131000	420	399	'Manual'	15	2000
	146000	434	429	'Manual'	15	2000
	144000	429	429	'Manual'	15	2000
	151000	450	429	'Manual'	15	2000
	134000	417	410	'Manual'	15	2000
	NaN	NaN	NaN	'None'	15	2000
	NaN	NaN	NaN	'None'	15	2000
	132000	431	389	'Manual'	15	2000
	147000	468	401	'Manual'	15	2000
	134000	422	405	'Manual'	15	2000
	104000	383	345	'Manual'	15	2000
	134000	428	398	'Manual'	15	2000
	133000	417	408	'Manual'	15	2000
	122000	398	390	'Manual'	15	2000
	NaN	NaN	NaN	'None'	15	2000
	NaN	NaN	NaN	'None'	15	2000
	111000	387	365	'Manual'	15	2000
	115000	386	381	'Manual'	15	2000
	137000	420	417	'Manual'	15	2000
	76006	379.531	327.592	'Auto'	15	2000
	134291	436.695	396.865	'Auto'	15	2000
	128192	443.231	380.296	'Auto'	15	2000
	126193	422.093	390.452	'Auto'	15	2000
	136000	420	414	'Manual'	15	2000
	148952	458.061	423.006	'Auto'	15	2000
	138000	419	419	'Manual'	15	2000
	99413	406.229	389.302	'Auto'	15	2000
	89983	409.735	358.22	'Auto'	40	10
	NaN	NaN	NaN	'None'	40	10
	107411	395.63	371.989	'Auto'	40	10
	152572	455	426	'Manual'	40	10
	59139	315.181	306.191	'Auto'	40	10
	122590	423.043	379.901	'Auto'	40	10
	105162	402.28	392.895	'Auto'	40	10
	85905	394.393	349.827	'Auto'	40	10
	156948	450	444	'Manual'	40	10
	134547	422	405	'Manual'	40	10
	86002	381.008	342.963	'Auto'	40	10
	143942	453.807	418.02	'Auto'	40	10
	162841	500.45	440.761	'Auto'	40	10
	155980	460.821	440.688	'Auto'	40	10
	160524	490.621	422.932	'Auto'	40	10
	147092	459.685	418.152	'Auto'	40	10
	164288	479.325	444.132	'Auto'	40	10
	NaN	NaN	NaN	'None'	40	10
	NaN	NaN	NaN	'None'	40	10
	126706	420.41	397.765	'Auto'	40	10
	141118	457.548	398.485	'Auto'	40	10
	NaN	NaN	NaN	'None'	40	10
	209438	554.555	491.215	'Auto'	40	10
	142543	429	423	'Manual'	40	10
	149574	457.846	423.43	'Auto'	40	10
	158522	503.623	408.482	'Auto'	40	10
	NaN	NaN	NaN	'None'	40	10
	148645	465.46	422.461	'Auto'	40	10
	146515	441	423	'Manual'	40	10
	177378	582.602	418.591	'Auto'	40	10
	164455	463.491	456.812	'Auto'	40	10
	130383	444.243	384.921	'Auto'	40	10
