# Supplementary material for: Extracellular matrix in multicellular aggregates acts as a pressure sensor controlling cell proliferation and motility
Source: eLife. 2021 Mar 11;10:e63258. doi: 10.7554/eLife.63258 (PMC8064752; doi:10.7554/eLife.63258)
Supplement: Figure 4—source data 4. [file elife-63258-fig4-data4.xlsx]

## Sheet: Fig 4F
	Cell proliferation on Petri Dish (eLife figure 4f)
	Cells t = 0 (cells/ml)	Cells t = 41.5 h (cell/ml)	MW Dextran [kDa]	Dextran Pressure [kPa]	tau division	Average	Sandard deviation	SEM
	60000	680000	0	0	17.094
	60000	640000	0	0	17.5318
	60000	648000	0	0	17.4403
	108000	1576000	0	0	15.4821
	108000	1632000	0	0	15.283
	108000	1536000	0	0	15.632	16.4106	1.05111	0.429115
	60000	720000	10	5	16.7008
	60000	816000	10	5	15.9
	60000	864000	10	5	15.5592
	108000	1504000	10	5	15.757
	108000	1640000	10	5	15.2556
	108000	1624000	10	5	15.3107	15.7472	0.529223	0.216055
	60000	848000	2000	5	15.669
	60000	672000	2000	5	17.1778
	60000	760000	2000	5	16.3452
	108000	1696000	2000	5	15.0696
	108000	1720000	2000	5	14.9931
	108000	1608000	2000	5	15.3669	15.7702	0.846123	0.345428

## Sheet: FIG 4G
	Cell speed in MCS (Dynamic Light Scattering), Brunel et al. (eLife figure 4g)
	Pressure [kPa]	Dextran MW	Speed [µm/h]	Standard error of the spead [µm/h]
	0	0	12	1
	0	0	11	2
	0	0	11.6	0.8
	0	0	9	2
	0	0	7	1
	5	10	11.1	0.6
	5	10	10	2
	5	10	11.2	0.8
	5	10	9.3	0.8
	5	10	6.8	0.8
	5	2000	3.6	0.6
	5	2000	5	0.9
	5	2000	6.3	0.7
	5	2000	4.7	0.6
	5	2000	4.6	0.6
	5	2000	4.6	0.4
