# Supplementary material for: Extracellular matrix in multicellular aggregates acts as a pressure sensor controlling cell proliferation and motility
Source: eLife. 2021 Mar 11;10:e63258. doi: 10.7554/eLife.63258 (PMC8064752; doi:10.7554/eLife.63258)
Supplement: Figure 5—source data 2. [file elife-63258-fig5-data2.xlsx]

## Sheet: FIG 5EF
	Nuclear fluorescence evolution over the time (Hoechst), with pressure and no pressure (eLife Fig 5ef)
	Date Day1	Day	MW Dextran [kDa]	Dextran Pressure [kPa]	Counts	Gain	Gain-corrected counts	Blank average	Fluorescence normalized to blank
	2020-02-14	4	0	0	31661	0.45	70357.8	72446.7	0.971167
	2020-02-14	4	0	0	33541	0.45	74535.6		1.02883
	2020-02-14	4	10000	1000	34880	0.45	77511.1		1.06991
	2020-02-14	4	10000	1000	26914	0.45	59808.9		0.825557
	2020-02-14	4	2000000	1000	44822	0.45	99604.4		1.37487
	2020-02-14	4	2000000	1000	41105	0.45	91344.4		1.26085
	2020-02-14	4	10000	5000	27699	0.45	61553.3		0.849637
	2020-02-14	4	10000	5000	26543	0.45	58984.4		0.814177
	2020-02-14	4	2000000	5000	28980	0.45	64400		0.88893
	2020-02-14	4	2000000	5000	6149	0.45	13664.4		0.188614
	2020-01-20	3	0	0	43110	1	43110	43191.5	0.998113
	2020-01-20	3	0	0	43273	1	43273		1.00189
	2020-01-20	3	10000	5000	38612	1	38612		0.893972
	2020-01-20	3	10000	5000	32559	1	32559		0.753829
	2020-01-20	3	2000000	5000	26610	1	26610		0.616093
	2020-01-20	3	2000000	5000	26637	1	26637		0.616719
	2020-01-15	2	0	0	15151	1	15151	15151	1
	2020-01-15	2	10000	5000	10385	1	10385		0.685433
	2020-01-15	2	2000000	5000	6483	1	6483		0.427893
	2020-01-15	3	0	0	42486	1	42486	42486	1
	2020-01-15	3	10000	5000	34030	1	34030		0.80097
	2020-01-15	3	2000000	5000	13685	1	13685		0.322106
	2020-01-15	4	0	0	42486	0.59	72010.2	72010.2	1
	2020-01-15	4	10000	5000	34030	0.59	57678		0.80097
	2020-01-15	4	2000000	5000	13685	0.59	23194.9		0.322106
	2020-01-15	6	0	0	41746	0.49	85195.9	85195.9	1
	2020-01-15	6	10000	5000	32665	0.49	66663.3		0.78247
	2020-01-15	6	2000000	5000	21745	0.49	44377.6		0.520888
	2020-01-15	6	2000000	5000	15555	0.49	31744.9		0.372611
	2019-12-10	4	0	0	42901	1	42901	42264.5	1.01506
	2019-12-10	4	0	0	45684	1	45684		1.08091
	2019-12-10	4	0	0	40702	1	40702		0.96303
	2019-12-10	4	0	0	39771	1	39771		0.941002
	2019-12-10	4	10000	5000	37698	1	37698		0.891954
	2019-12-10	4	10000	5000	37067	1	37067		0.877024
	2019-12-10	4	10000	5000	38059	1	38059		0.900496
	2019-12-10	4	10000	5000	40779	1	40779		0.964852
	2019-12-10	4	2000000	5000	23484	1	23484		0.555644
	2019-12-10	4	2000000	5000	26561	1	26561		0.628447
	2019-12-10	4	2000000	5000	26432	1	26432		0.625395
	2019-12-10	4	2000000	5000	25974	1	25974		0.614558
	2019-12-10	4	2000000	5000	22626	1	22626		0.535343
	2019-12-05	3	0	0	10696	1	10696	12862.3	0.831575
	2019-12-05	3	0	0	14341	1	14341		1.11496
	2019-12-05	3	0	0	13550	1	13550		1.05346
	2019-12-05	3	10000	5000	12211	1	12211		0.949361
	2019-12-05	3	10000	5000	12739	1	12739		0.990411
	2019-12-05	3	10000	5000	11545	1	11545		0.897582
	2019-12-05	3	2000000	5000	9451	1	9451		0.734781
	2019-12-05	3	2000000	5000	12067	1	12067		0.938166
	2019-12-05	3	2000000	5000	7939	1	7939		0.617229
	2019-12-05	3	2000000	5000	7280	1	7280		0.565994

## Sheet: FIG 5G
	MG Concentration	2 g/l	3 g/l	4 g/l	6 g/l	8 g/l
	Proliferation normalized with respect to reference experiments at 4 g/l	0.963562	1.0447	1.2828	1.1301	0.99
		0.876192	1.1362	1.1986	1.4836	0.8874
		0.706698	1.1586	0.9561	0.5318	0.8259
		1.14147	0.942	0.5625	1.3461	0.8287
		0.839881		0.9685	1.1608	1.0074
		1.06422		1.0315	1.0776	0.9567
		0.975508		0.998	1.9464	0.9083
		0.754839		1.002	0.6795	1.2547
		2.28257		1	0.718	1.1621
		1.86267		1	0.6562	1.0427
		1.08453		1		0.5023
		1.11352		1		0.4535
				1.0161
				1.0866
				0.9604
				0.9369
				0.7854
				1.1465
				1.0681
	Average	1.1388	1.07038	1	1.07301	0.901642
	Standard deviation	0.46624	0.0987521	0.149109	0.442779	0.234718
	SEM	0.134592	0.049376	0.0342081	0.140019	0.0677573
